# Supplementary material
Source: publisher figshare collection journal article supplement (https://acs.figshare.com/ndownloader/files/28747281)
Supplement: Supplementary file 1 [file 28747281]

# Amine-Functionalized Graphene Quantum Dots for Fluorescence-Based Immunosensing of Ferritin

Mayank Garg<sup>1,2</sup>, Neelam Vishwakarma<sup>1</sup>, Amit L. Sharma<sup>1,2\*</sup>, Suman Singh<sup>1,2\*</sup>

<sup>1</sup>CSIR- Central Scientific Instruments Organisation, Sector 30-C, Chandigarh-160030, India

<sup>2</sup>Academy of Scientific and Innovative Research (AcSIR), Ghaziabad-201002, India

\*Corresponding author: [ssingh@csio.res.in](mailto:ssingh@csio.res.in), [amitsharma\\_csio@csio.res.in](mailto:amitsharma_csio@csio.res.in)

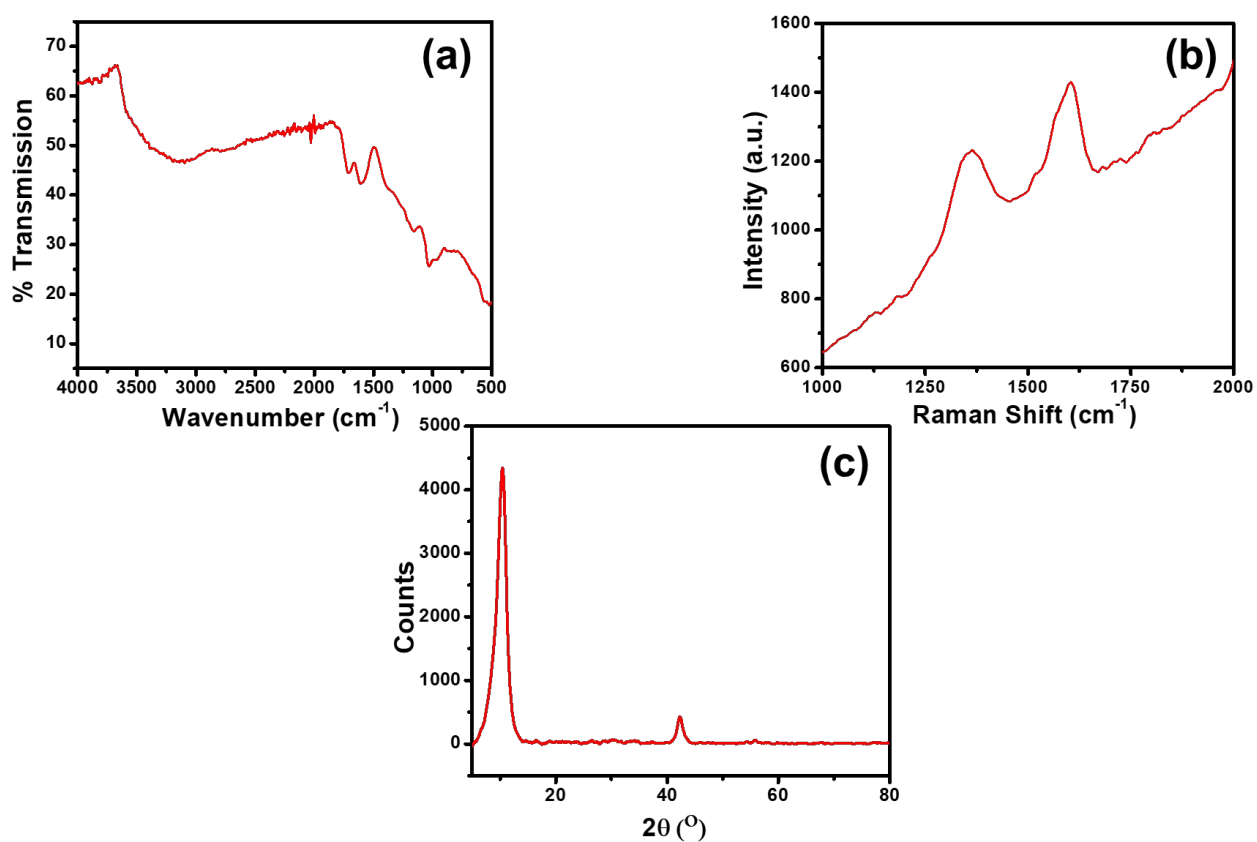

**Fig. S1:** (a) FTIR, (b) Raman spectra and (c) XRD pattern of graphene oxide

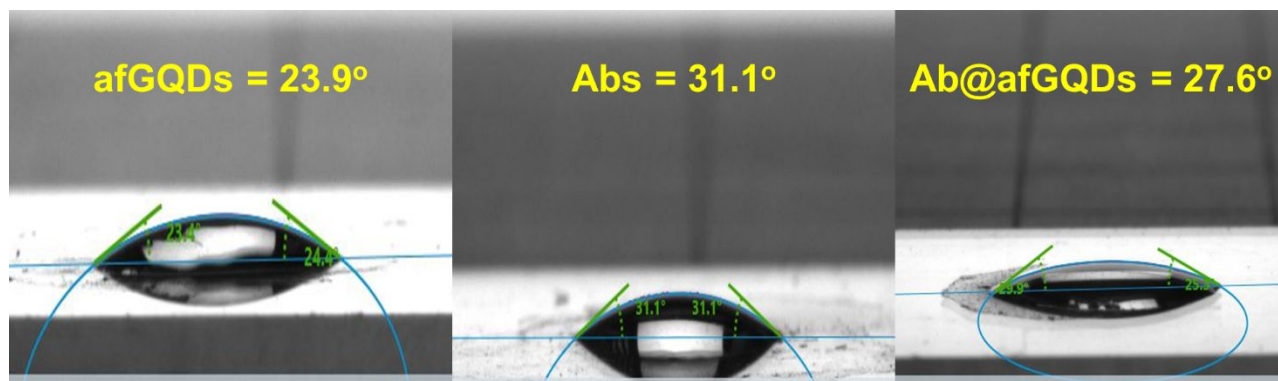

**Fig. S2:** Contact angle measurements of afGQDs, antibodies (Abs) and antibody immobilized on afGQDs (Ab@afGQDs)

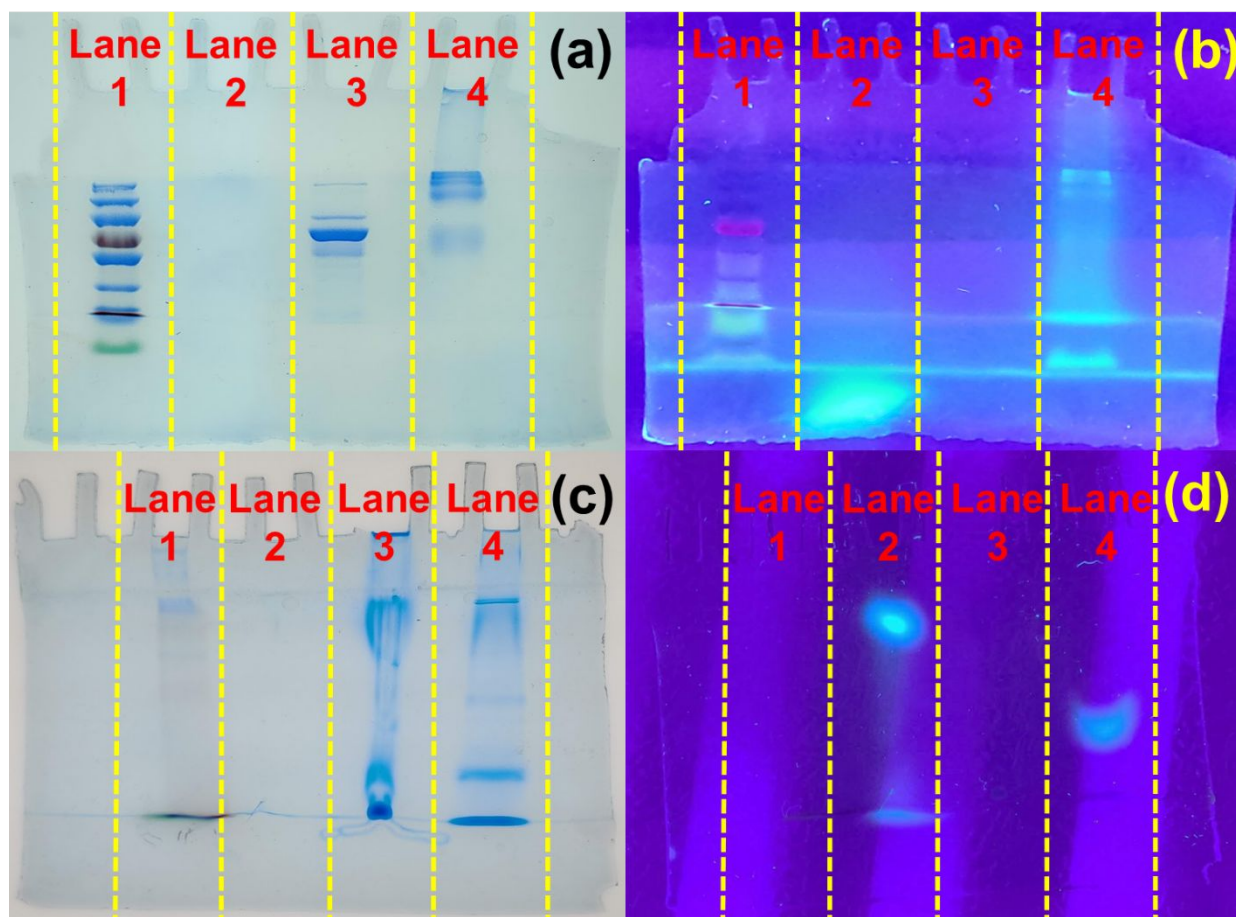

**Fig. S3:** (a) Image showing the bands obtained after SDS-PAGE. Lane 1: Protein Ladder; Lane 2: afGQDs; Lane 3: antibodies; Lane 4: Ab@afGQDs under visible light and (b) showing the same bands under UV light (c) Image showing the bands obtained after Native-PAGE. Lane 1:

Protein Ladder; Lane 2: afGQDs; Lane 3: antibodies; Lane 4: Ab@afGQDs under visible light and (d) showing the same bands under UV light [UV image enhanced: Brightness: 0% (Normal), Contrast: -40% for better visualization]

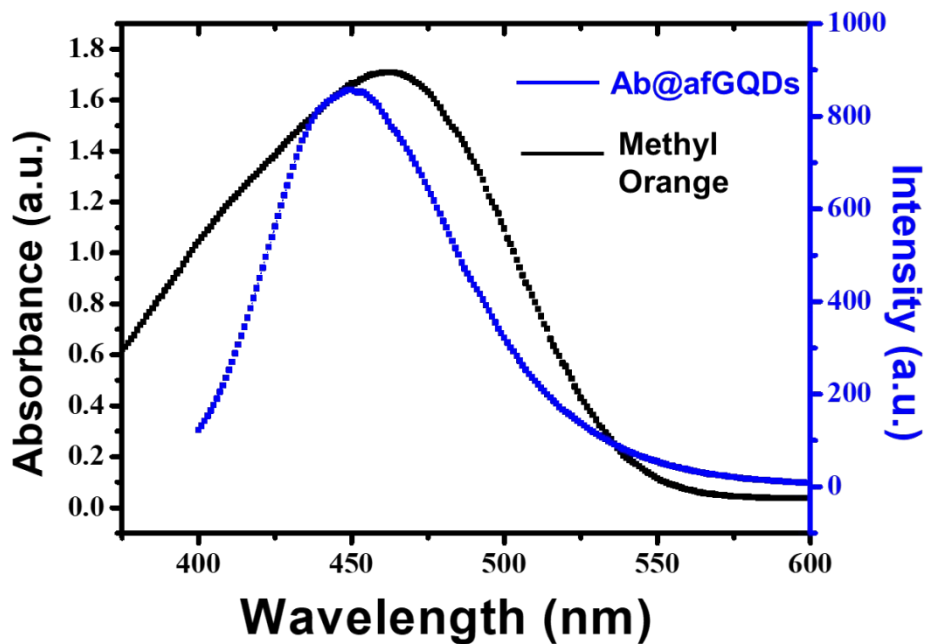

**Fig. S4:** Spectral overlap of absorption spectrum of methyl orange and emission spectrum of Ab@afGQDs

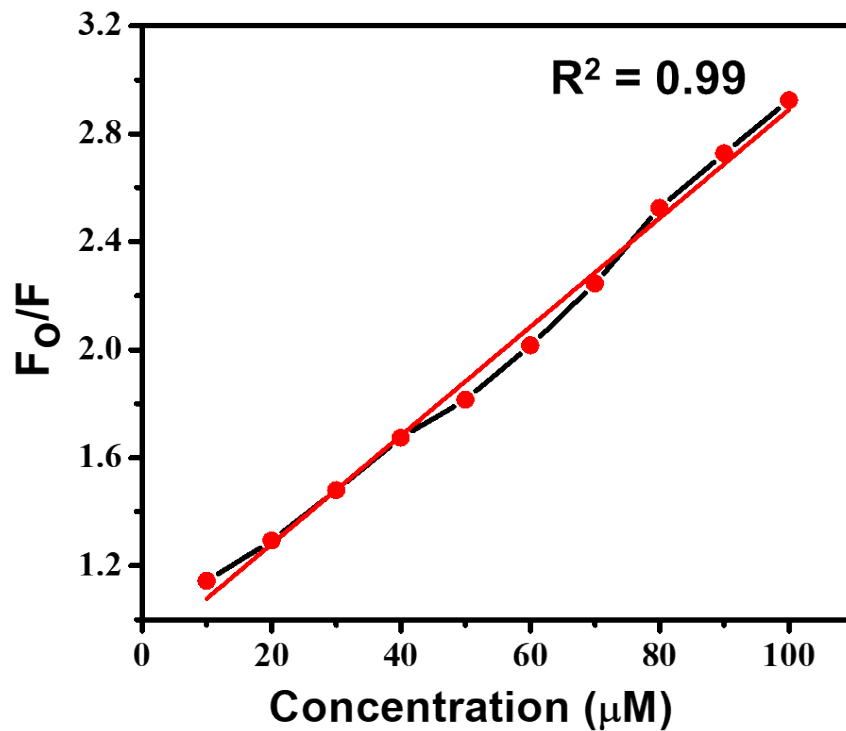

**Fig. S5:** Stern-Volmer Plot of Ab@afGQDs in the presence of increasing methyl orange concentrations [ $F_0$  and  $F$  is the fluorescence intensity of Ab@afGQDs in the absence and presence of methyl orange respectively]

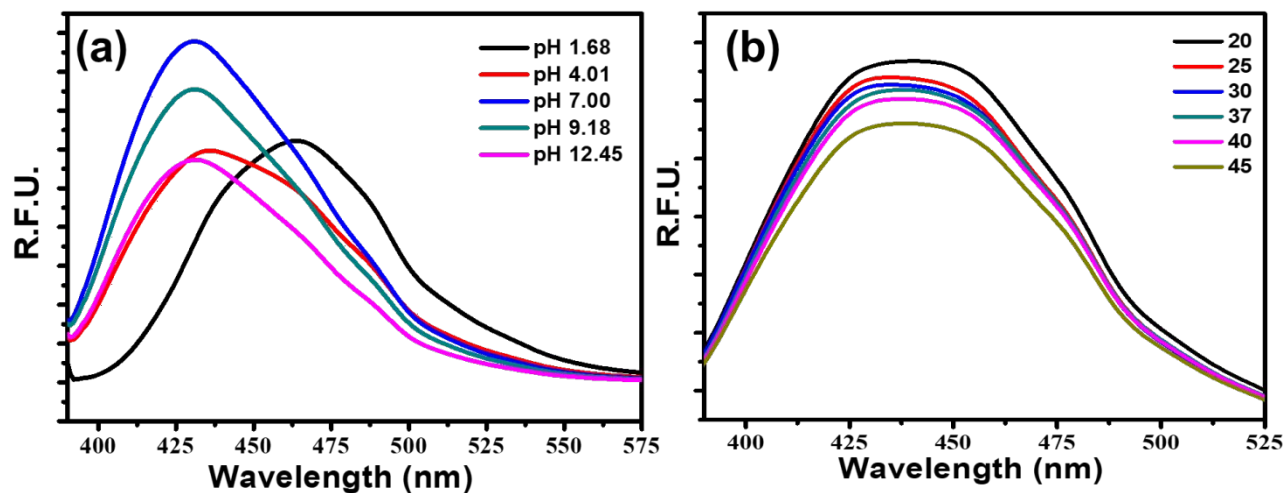

**Fig. S6:** (a) Effect of pH and (b) Effect of temperature [R.F.U.: Relative Fluorescence Units]

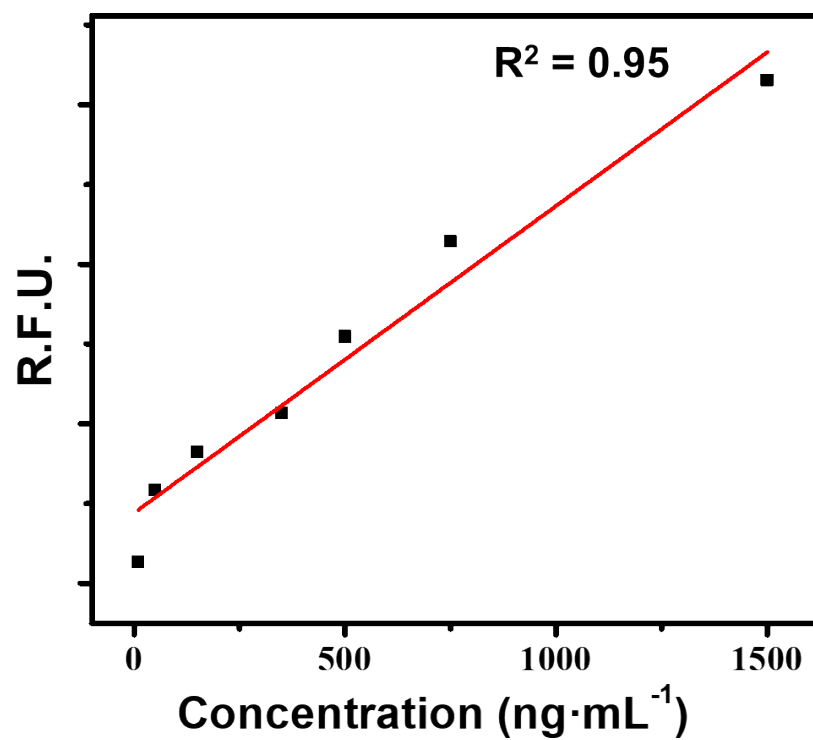

**Fig. S7:** Calibration curve for ferritin sensing in serum samples [R.F.U.: Relative Fluorescence Units]
